# Supplementary material for: Evaluation of the coupling of EMACv2.55 to the land surface and vegetation model JSBACHv4
Source: Copernicus journal article supplement (doi:10.5194/gmd-17-5705-2024), 2024-07-30
Supplement: Supplementary file 1 [file gmd-17-5705-2024-supplement.pdf]

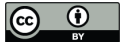

*Supplement of*

## **Evaluation of the coupling of EMACv2.55 to the land surface and vegetation model JSBACHv4**

**Anna Martin et al.**

*Correspondence to:* Anna Martin (a.martin@mpic.de)

The copyright of individual parts of the supplement might differ from the article licence.

## Contents

|                                                               |           |
|---------------------------------------------------------------|-----------|
| <b>S1 Input Files</b>                                         | <b>1</b>  |
| <b>S2 Example namelist for EMAC/JSBACH: <i>jsbach.nml</i></b> | <b>2</b>  |
| <b>S3 Schematic of JSBACH in EMAC</b>                         | <b>11</b> |
| <b>5 S4 Parameter optimisation</b>                            | <b>12</b> |

## S1 Input Files

**Table S1.** JSBACH input file overview. *grid* corresponds to the simulation gridsize and *year* to the reference year.

| Initial conditions                        | filename                                                                    |
|-------------------------------------------|-----------------------------------------------------------------------------|
| Initial data for the Carbon Pools         | <code>cpools_vga0218_18991231_tiles.nc</code>                               |
| Initial data for soil and land properties | <code>ic_land_soil_grid_1976_tsrf_clim.nc</code>                            |
|                                           | <code>jsbach_grid_11tiles_5layers_year_no-dynveg_layer_moist.nc</code>      |
|                                           | <code>jsbach_grid_11tiles_5layers_year_no-dynveg_albedo.nc</code>           |
|                                           | <code>jsbach_grid_11tiles_5layers_year_no-dynveg_cover_fract.nc</code>      |
|                                           | <code>jsbach_grid_11tiles_5layers_year_no-dynveg_cover_type.nc</code>       |
|                                           | <code>jsbach_grid_11tiles_5layers_year_no-dynveg_nn.nc</code>               |
|                                           | <code>jsbach_grid_11tiles_5layers_year_no-dynveg_soil_layer_depth.nc</code> |
|                                           | <code>jsbach_grid_11tiles_5layers_year_no-dynveg_veg_fract.nc</code>        |
|                                           | <code>bc_land_soil_grid_year_fract_org.nc</code>                            |
|                                           | <code>bc_land_soil_grid_year_nn.nc</code>                                   |

## S2 Example namelist for EMAC/JSBACH: *jsbach.nml*

The following snippets of the *jsbach* namelist show the default simulation setup for the JSBACH submodel.

---

```
10  1:  ! -*- f90 -*-
    2:  &CTRL
    3:  l_verbose= F      ! verbose output of model (debugging)
    4:  /
    5:  &CPL
15  6:  !#####
    7:  !## JSBACH switches for PROCESS in CALL ORDER FOR DEBUGGING
    8:  !## DEFAULT = .true.
    9:  !#####
10:         L_CARBON                        = T,
20 11:         L_FUEL                        = T,
12:         L_RADIATION                    = T,
13:         L_PHENOLOGY                    = T,
14:         L_HYDROLOGY                    = T,
15:         L_SEB                          = T,
25 16:         L_SSE                        = T,
17:         L_ASSIMILATION                  = T,
18:         L_TURBULENCE                    = T,
19:         L_DISTURB                       = T,
20:         !#FUEL
30 21:         L_update_fuel                  = .true.,
22:         !#DISTURBANCE
23:         L_update_natural_disturbances    = .true.,
24:         !#RADIATION
25:         L_update_surface_radiation       = .true.,
35 26:         !#PHENOLOGY
27:         L_update_phenology_logrop        = .true.,
28:         L_update_fpc                     = .true.,
29:         !#HYDROLOGY
30:         L_update_snow_and_skin_fraction  = .true.,
40 31:         L_update_soil_properties        = .true.,
32:         !#SURFACE ENERGY BALANCE
33:         L_update_surface_energy_land     = .true.,
34:         L_update_surface_energy_lake     = .true.,
35:         !#HYDROLOGY
```

```

45 36:         L_update_evaporation           = .true.,
37:     !#SURFACE ENERGY BALANCE
38:         L_update_surface_fluxes_land     = .true.,
39:         L_update_surface_fluxes_lake     = .true.,
40:     !#RADIATION
50 41:         L_update_radiation_par          = .true.,
42:     !#HYDROLOGY
43:         L_update_surface_hydrology       = .true.,
44:         L_update_snow_and_skin_fraction  = .true.,
45:     !#SOIL and SNOW ENERGY
55 46:         L_update_soil_and_snow_properties = .true.,
47:         L_update_soil_and_snow_temperature = .true.,
48:     !#HYDROLOG
49:         L_update_soil_hydrology          = .true.,
50:     !#SURFACE ENERGY BALANCE
60 51:         L_update_snowmelt_correction      = .true.,
52:     !#ASSIMILATION
53:         L_update_assimilation_scaling_factors = .true.,
54:         L_update_canopy_cond_unstressed_assimilation = .true.,
55:         L_update_canopy_cond_stressed_assimilation = .true.,
65 56:         L_update_assimilation           = .true.,
57:     !#HYDROLOGY
58:         L_update_canopy_cond_unstressed   = .true.,
59:         L_update_water_stress            = .true.,
60:         L_update_canopy_cond_stressed    = .true.,
70 61:     !#CARBON
62:     ! warning CO2 gas tracer must be present!
63:         L_update_C_NPP_pot_allocation     = .true.,
64:     !#TURBULENCE
65:         L_update_humidity_scaling        = .true.,
75 66:         L_update_roughness              = .true.,
67:     !#RADIATION
68:         L_update_albedo                  = .true.,
69:     !#HYDROLOGY
70:         L_update_water_balance           = .true.,
80 71: !#####
72: !## JSBACH logical switches
73: !#####

```

```

74:         l_freeze                    = T,
75:         l_supercool                  = T,
85 76:         l_dynsnow                    = T,
77:         l_heat_cap_dyn                = T,
78:         l_heat_cond_dyn               = T,
79:         l_ice_on_lakes                = T,
80:         l_snow                        = T,
90 81:         l_organic                    = T,
82:         ltpe_closed                   = F,
83:         ltpe_open                     = F,
84:         l_forestRegrowth              = T,
85:         l_use_alb_canopy              = T,
95 86:         l_use_alb_veg_simple          = T,
87:         l_use_alb_soil_scheme         = F,
88:         l_use_alb_soil_litter         = T,
89:         l_use_alb_mineralsoil_const   = T,
90:         l_use_alb_soil_organic_C      = T, !T: 'linear', F: 'log'
100 91:         l_burn_pasture                = T,
92:         l_use_quincy                  = F, !QUINCY not implemented
93: #####
94: !## EMAC INPUT DATA
95: #####
105 96: ! The following channel objects are just input.
97: ! JSBACH will not modify them.
98: input_fract_lake                    = 'ECHAM5', 'alake', ! [1]
99: input_land_mask                     = 'ECHAM5', 'slm', ! [1]
100: input_slf                           = 'ECHAM5', 'slf', ! [1]
110 101: input_fract_glacier                 = 'g3b', 'glac', ! [1]
102: input_press_srf                     = 'g3b', 'aps', ! [Pa]
103: input_t_air                         = 'e5vdiff', 'temp2', ! [K]
104: input_t_acoef                       = 'e5vdiff', 'zetn1', !
      \ [1]Richtmyer-morton-coefficients, t=dry static energy, q=moisture
115 105: input_t_bcoef                      = 'e5vdiff', 'zftn1', ! [J/kg]
106: input_t_acoef_wtr                   = 'e5vdiff', 'zetnw', ! [1]
107: input_t_bcoef_wtr                   = 'e5vdiff', 'zftnw', ! [J/kg]
108: input_t_acoef_ice                   = 'e5vdiff', 'zetni', ! [1]
109: input_t_bcoef_ice                   = 'e5vdiff', 'zftni', ! [J/kg]
120 110: input_q_acoef                      = 'e5vdiff', 'zeqnl', ! [1]

```

```

111: input_q_bcoef          = 'e5vdiff', 'zfqn1',    ! [kg/kg]
112: input_q_acoef_wtr     = 'e5vdiff', 'zeqnw',    ! [1]
113: input_q_bcoef_wtr     = 'e5vdiff', 'zfqnw',    ! [kg/kg]
114: input_q_acoef_ice     = 'e5vdiff', 'zeqni',    ! [1]
125 115: input_q_bcoef_ice  = 'e5vdiff', 'zfqni',    ! [kg/kg]
116: input_drag_srf       = 'e5vdiff', 'cfhl',    ! (neutral)/ drag coefficients,
      \was cdn1, cdnw, cdni
117: input_drag_wtr       = 'e5vdiff', 'cfhw',    ! [-]
118: input_drag_ice       = 'e5vdiff', 'cfhi',    ! [-]
130 119: input_pch         = 'e5vdiff', 'chl',      ! surface drag [1]
120: input_wind_10m       = 'e5vdiff', 'wind10',   ! [m s-1]
121: input_cos_zenith_angle = 'orbit',  'cossza',   ! [-]
122: input_declination    = 'orbit',  'dec_off',  ! [degrees, angle sun at equator]
123: input_rad_sw_lwtr    = 'rad01',  'soflw',   ! [W m-2]
135 124: input_rad_sw_lice  = 'rad01',  'sofli',   ! [W m-2]
125: input_rad_lw_lwtr    = 'rad01',  'trflw',   ! [W m-2]
126: input_rad_lw_lice    = 'rad01',  'trflw',   ! [W m-2]
127: input_q_rel_air_climbuf = 'e5vdiff', 'rh_2m',   ! [-]
128: input_oro_stddev     = 'g3b',    'orostd',   ! [m]
140 129:
130: ! The following channel objects are just input.
131: ! Only srf level is used.
132: input_wind_u          = 'ECHAM5',  'um1',     ! [m/s]
133: input_wind_v          = 'ECHAM5',  'vm1',     ! [m/s]
145 134: input_cv_rain      = 'ECHAM5',  'rsfc_2d',  ! [kg m-2 s-1]
135: input_ls_rain         = 'ECHAM5',  'rsfl_2d',  ! [kg m-2 s-1]
136: input_cv_snow         = 'ECHAM5',  'ssfc_2d',  ! [kg m-2 s-1]
137: input_ls_snow         = 'ECHAM5',  'ssfl_2d',  ! [kg m-2 s-1]
138: input_lwflx           = 'rad01',  'flxt',    ! [W m-2]
150 139: input_swflx        = 'rad01',  'flxs',    ! shortwave flux [W m-2]
140: input_swnirflx        = 'rad01',  'flxnir',  ! NIR flux all sky [W m-2]
141: input_swvisflx        = 'rad01',  'flxsw1',  ! SW1 flux all sky (VIS) [W m-2]
142: input_lwflx_up        = 'rad01',  'flxut',   ! longwave flux [W m-2]
143: input_swflx_up        = 'rad01',  'flxus',   ! shortwave flux [W m-2]
155 144:
145:
146: ! The following channel objects exist already in MESSy.

```

```

147: ! SURFACE did not update those variables, but JSBACH will update them (only over land and
      \lakes)
160 148: ! either via calculation or according to the jsbach input files.
149: input_vol_heat_cap      = 'g3b',      'rgcgn',      ! Volumetric heat capacity of the
      \soil [j/m**3/K]
150: input_az0              = 'g3b',      'az0',        ! roughness length orography [m]
151: input_fract_forest     = 'ECHAM5', 'forest',     ! forest fraction [1]
165 152: input_fract_fpc     = 'ECHAM5', 'vgrat',     ! vegetation fraction rel to land
      \[1]
153: input_fract_fpc_mon    = 'ECHAM5', 'vgrat',     ! vegetation fraction rel to
      \land, monthly [1]
154: input_latent_hflx      = 'e5vdiff', 'ahfl',      ! latent heat flux [W m-2]
170 155: input_latent_hflx_lnd = 'e5vdiff', 'ahfl1', ! latent heat flux over land [W
      \m-2]
156: input_latent_hflx_wtr  = 'e5vdiff', 'ahflw',     ! latent heat flux over water [W
      \m-2]
157: input_latent_hflx_ice  = 'e5vdiff', 'ahfli',     ! latent heat flux over ice [W
      \m-2]
175 158: input_sensible_hflx   = 'e5vdiff', 'ahfs',      ! sensible heat flux [W m-2]
159: input_sensible_hflx_lnd = 'e5vdiff', 'ahfs1',     ! sensible heat flux over land [W
      \m-2]
160: input_sensible_hflx_wtr = 'e5vdiff', 'ahfsw',     ! sensible heat flux over water
180  \[W m-2]
161: input_sensible_hflx_ice = 'e5vdiff', 'ahfsi',     ! sensible heat flux over ice [W
      \m-2]
162: input_evapo_wtr        = 'e5vdiff', 'evapw',     ! evaporation over water [kg m-2
      \s-1]
185 163: input_evapo_ice      = 'e5vdiff', 'evapi',     ! evaporation over ice [kg m-2
      \s-1]
164: input_evapopot         = 'e5vdiff', 'evapot_2d', ! potential
      \evaporation/sublimation [kg m-2 s-1]
165: input_evapl            = 'e5vdiff', 'evapl_2d', ! evaporation land
190 166: input_evap           = 'e5vdiff', 'evap',      ! evaporation
167:
168: ! The following channel objects exist already in MESSy and will be updated by JSBACH
169: ! SURFACE did update them before.
170: input_depth_lice       = 'g3b',      'siced',      ! seaice depth [m]
195 171: input_seaice         = 'g3b',      'seaice',     ! seaice fraction rel to ocean [1]

```

```

172: input_seacov           = 'ECHAM5', 'seacov', ! sea cover (fraction of grid
    \box) [1]
173: input_landcov         = 'ECHAM5', 'landcov', ! land cover (fraction of grid
    \box) [1]
200 174: input_fract_lice    = 'ECHAM5', 'icecov', ! ice cover (fract of gb) only
    \over water [1]
175: input_water_content   = 'g3b', 'ws', ! Soil water content [m]
176: input_w_skin          = 'g3b', 'wl', ! Water content skin reservoir
    \ (soil&canopy) [m]
205 177: input_t_unfilt      = 'g3b', 'tslm', ! T(t) Surface temperature,
    \unfiltered [K]
178: input_t_old           = 'g3b', 'tslm1', ! T(t-dt) Surface temperature
    \t-dt [K]
179: input_t_soil          = 'g3b', 'tsoil', ! Temperature [K] in the five
210 \soil layers [K]
180: input_tsi             = 'g3b', 'tsi', ! Lake surface temperature (ice)
    \[K]
181: input_t_lwtr          = 'g3b', 'tsw', ! surface temperature of water [K]
182: input_t                = 'ECHAM5', 'tsurf', ! surface temperature [K]
215 183: input_snowmelt       = 'g3b', 'snmel', ! Snow melt [kg/m**2]
184: input_w_snow_can      = 'g3b', 'snc', ! Snow depth canopy [m water
    \equivalent]
185: input_w_snow_soil     = 'g3b', 'sn', ! Snow depth ground [m water
    \equivalent]
220 186: input_w_snow_lice    = 'g3b', 'sni', ! Snow depth ice [m water
    \equivalent]
187: input_snow_accum      = 'g3b', 'snacl', ! Snow budget at non-glacier
    \points [kg/m**2]
188: input_w_glac          = 'g3b', 'gld', ! Glacier depth (including snow)
225 \[m water equivalent]
189: input_runoff_glac     = 'g3b', 'rogl', ! Glacier runoff (rain+snow/ice
    \melt) [kg/m**2]
190: input_adrain          = 'ECHAM5', 'adrain', ! Drainage at non-glacier points
    \[m]
230 191: input_aros           = 'ECHAM5', 'aros', ! atmospheric runoff [m]
192: input_hcap_grnd       = 'g3b', 'grndcapc', ! Heat capacity of the uppermost
    \soil layer [J/m**2/K]
193: input_grnd_hflx       = 'g3b', 'grndhflx', ! Ground heat flux [J m-2 s-1]

```



```

194: input_evapo_skin      = 'ECHAM5', 'evwsd', ! Evaporation from skin reservoir
235   \ [1]
195: input_hflx_cond_ice  = 'g3b',   'ahfice', ! conductive heat flux [W m-2]
196: input_fract_snow_lice = 'ECHAM5', 'cvsi', ! snow cover over ice (fraction
      \ of grid box) [1]
197: input_fract_snow_can = 'ECHAM5', 'cvsc', ! Fractional snow cover canopy [1]
240 198: input_fract_snow   = 'ECHAM5', 'cvs', ! Fractional snow cover [1]
199: input_lai           = 'ECHAM5', 'vlt', ! leaf area index [1]
200: input_wsmx          = 'g3b',   'wsmx', ! field capacity (water holding
      \ capacity) of soil [m]
201: input_grndflux      = 'g3b',   'grndflux', ! grndflux+grndhflx*slm*dtime
245   \ [W/m**2]
202: input_cvw           = 'ECHAM5', 'cvw', ! Skin reservoir fraction (=
      \ pwl/pwlmx, see *vdiff*)
203: input_runoff_hd     = 'g3b',   'runoff', ! Total runoff non-glacier points
      \ (acc.) [kg/m**2s]
250 204: input_drainage_hd = 'ECHAM5', 'adrain', ! Drainage at non-glacier points
      \ [m/s]
205: input_albedo        = 'rad',   'albedo', ! surface albedo [1]
206:
207: !#####
255 208: !##JSBACH input data /pool/data/JSBACH/...
209: !#####
210: ! The following channel objects exist already in MESSy.
211: ! JSBACH will use input data and overwrite the channel objects for the first timestep.
212: input_lai_init      = 'import_grid','in_lai_cl_lai_clim', !initial LAI from
260   \climatology [1]
213: ! The following channel objects don't exist in MESSy.
214: ! JSBACH will use input data and create new channel objects.
215: input_fract_fpc_max  = 'import_grid','in_jsb_veg_ratio_max', ! [1]
216: input_rough_m        = 'import_grid','in_alb_roughness_length', ! [m]
265 217: input_vol_field_cap = 'import_grid','in_jsb_soil_field_cap', ! [m/m]
218: input_cover_type_ti  = 'import_grid','in_jsb_ct_cover_type', ! [1]
219: input_cover_fract_ti = 'import_grid','in_jsb_lc_cover_fract', ! [1]
220: input_w_soil_sl      = 'import_grid','in_jsb_lm_layer_moist', ! [m]
221: input_soil_depth     = 'import_grid','in_jsb_soil_depth', ! [m]
270 222: input_vol_porosity  = 'import_grid','in_jsb_soil_porosity', ! [m/m]
223: input_pore_size_index = 'import_grid','in_jsb_pore_size_index', ! [-]

```

```

224: input_heat_cond      = 'import_grid','in_jsb_heat_conductivity',! [J m-1 s-1 K-1]
225: input_hyd_cond_sat  = 'import_grid','in_jsb_hyd_cond_sat',    ! [m/s]
226: input_vol_p_wilt    = 'import_grid','in_jsb_wilting_point',   ! [m/m]
275 227: input_bclapp     = 'import_grid','in_jsb_bclapp',          ! [-]
228: input_w_soil_column = 'import_grid','in_jsb_init_moist',      ! [m]
229: input_max_moist     = 'import_grid','in_jsb_maxmoist',    ! [m]
230: input_root_depth    = 'import_grid','in_jsb_root_depth',    ! [m]
231: input_matrix_pot    = 'import_grid','in_jsb_moisture_pot',    ! [m]
280 232: input_albedo_veg_vis = 'import_grid','in_alb_albedo_veg_vis', ! [1]
233: input_albedo_veg_nir = 'import_grid','in_alb_albedo_veg_nir', ! [1]
234: input_albedo_soil_vis = 'import_grid','in_alb_albedo_soil_vis', ! [1]
235: input_albedo_soil_nir = 'import_grid','in_alb_albedo_soil_nir', ! [1]
236: input_tclim         = 'import_grid','in_jsb_ic_surf_temp',    ! [K]
285 237: input_tclim_sum   = 'import_grid','in_jsb_tc_tclim_sum',    ! [K]
238: input_tclim_max     = 'import_grid','in_jsb_tc_tclim_max',    ! [K]
239: input_tclim_min     = 'import_grid','in_jsb_tc_tclim_min',    ! [K]
240: input_tclim_idx     = 'import_grid','in_jsb_tc_tidx',        ! [-]
241: input_fract_org_sl  = 'import_grid','in_fosl_fract_org_sl',    ! [1]
290 242: input_NPP_pot_yDayMean = 'import_grid','j_NPP_run_mean',      ! [mol(CO2)/m2
      \ (canopy) s]
243: !#####
244: !## JSBACH Input Carbon from cpools
245: !#####
295 246: ! Initial conditions for carbon pools, all in [mol(C)/m^2(canopy)] if not stated
      \otherwise.
247: input_c_green       = 'import_grid','j_Cpool_green',          ! Green
      \carbon pool: on input last value; updated on output [mol(C)/m^2(canopy) s]:
248: input_c_reserve     = 'import_grid','j_Cpool_reserve',        ! C-pool
300      \for carbohydrate reserve (sugars, starches) that allows plants to survive
249: input_c_woods       = 'import_grid','j_Cpool_woods',          ! C-pool
      \for stems, thick roots and other (dead) structural
250: input_c_crop_harvest = 'import_grid','j_Cpool_crop_harvest',    ! C-pool
      \for biomass harvested from crops [mol(C)/m^2(grid box)]
305 251: input_c_acid_agl  = 'import_grid','j_YCpool_acid_agl',      ! Above
      \ground litter-pool for acid soluble litter
252: input_c_water_agl   = 'import_grid','j_YCpool_water_agl',     ! - for
      \water soluble litter

```

```

253: input_c_ethanol_ag1      = 'import_grid','j_YCpool_ethanol_ag1',      ! - for
310   \ethanol soluble litter
254: input_c_nonsoluble_ag1  = 'import_grid','j_YCpool_nonsoluble_ag1',      ! -
      \non-soluble soluble litter
255: input_c_acid_bg1        = 'import_grid','j_YCpool_acid_bg1',      ! Below
      \ground litter-pool for acid soluble litter
315 256: input_c_water_bg1    = 'import_grid','j_YCpool_water_bg1',      ! - for
      \water soluble litter
257: input_c_ethanol_bg1    = 'import_grid','j_YCpool_ethanol_bg1',      ! - for
      \ethanol soluble litter
258: input_c_nonsoluble_bg1  = 'import_grid','j_YCpool_nonsoluble_bg1',      ! - for
320   \non-soluble litter
259: input_c_humus_1        = 'import_grid','j_YCpool_humus_1',
260: input_c_acid_ag2        = 'import_grid','j_YCpool_acid_ag2',
261: input_c_water_ag2       = 'import_grid','j_YCpool_water_ag2',
262: input_c_ethanol_ag2     = 'import_grid','j_YCpool_ethanol_ag2',
325 263: input_c_nonsoluble_ag2 = 'import_grid','j_YCpool_nonsoluble_ag2',
264: input_c_acid_bg2       = 'import_grid','j_YCpool_acid_bg2',
265: input_c_water_bg2      = 'import_grid','j_YCpool_water_bg2',
266: input_c_ethanol_bg2    = 'import_grid','j_YCpool_ethanol_bg2',
267: input_c_nonsoluble_bg2 = 'import_grid','j_YCpool_nonsoluble_bg2',
330 268: input_c_humus_2      = 'import_grid','j_YCpool_humus_2',
269: /

```

---

### S3 Schematic of JSBACH in EMAC

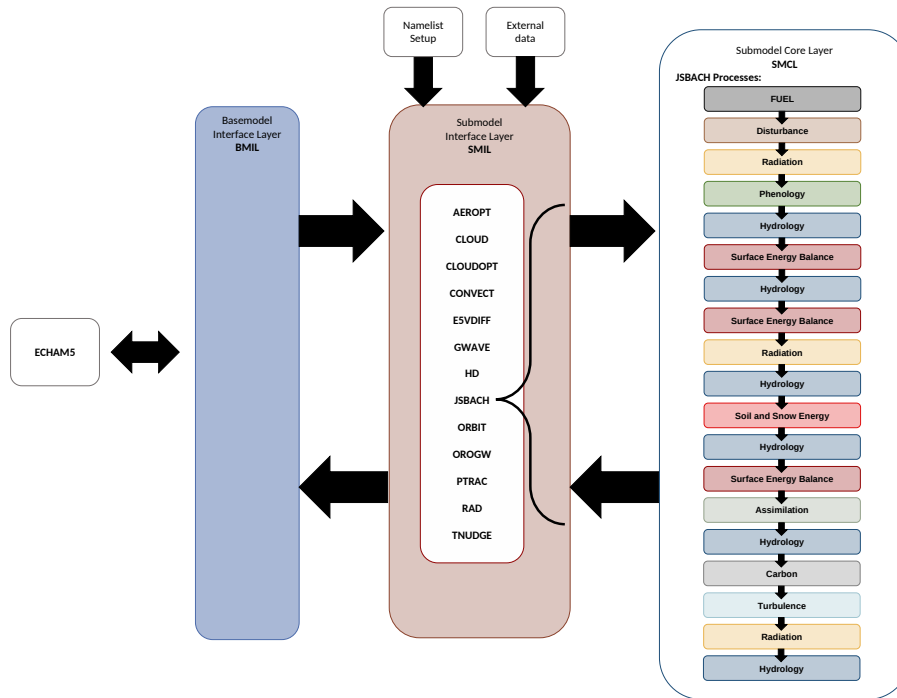

**Figure S1.** Schematic overview of JSBACH as new submodel in EMAC with corresponding processes.

## S4 Parameter optimisation

**Table S2.** List of optimised parameters of the control simulation (CTRL) and the 35 Simulations with varying parameters. Simulation 1 (EMAC/SRF) is performed with the SURFACE submodel, while simulation 2 to 35 are performed with the JSBACH submodel. The simulation with the parameters used for the EMAC/JSBACH setup is indicated in bold.

| Run                     | zasic          | zinhomi        | zinhoml                    | cmfctop       | cprcon [ $e-04s^2 m^{-2}$ ] |
|-------------------------|----------------|----------------|----------------------------|---------------|-----------------------------|
| 1 (EMAC/SRF)            | 0.85 (default) | 0.85 (default) | zinhoml <sub>default</sub> | 0.3 (default) | 1 (default)                 |
| 2 (CTRL)                | default        | default        | default                    | default       | default                     |
| 3                       | 0.8            | default        | default                    | default       | default                     |
| 4                       | default        | default        | default                    | default       | default                     |
| 5                       | 0.89           | default        | default                    | default       | default                     |
| 6                       | 0.91           | default        | default                    | default       | default                     |
| 7                       | default        | 0.8            | default                    | default       | default                     |
| 8                       | default        | default        | default                    | default       | default                     |
| 9                       | default        | 0.9            | default                    | default       | default                     |
| 10                      | default        | 0.95           | default                    | default       | default                     |
| 11                      | default        | 1              | default                    | default       | default                     |
| 12                      | default        | default        | 0.7                        | default       | default                     |
| 13                      | default        | default        | 0.77                       | default       | default                     |
| 14                      | default        | default        | 0.8                        | default       | default                     |
| 15                      | default        | default        | 0.9                        | default       | default                     |
| <b>16 (EMAC/JSBACH)</b> | default        | default        | 0.92                       | default       | default                     |
| 17                      | default        | default        | default                    | 0.2           | default                     |
| 18                      | default        | default        | default                    | 0.23          | default                     |
| 19                      | default        | default        | default                    | 0.26          | default                     |
| 20                      | default        | default        | default                    | default       | default                     |
| 21                      | default        | default        | default                    | 0.35          | default                     |
| 22                      | default        | default        | default                    | default       | default                     |
| 23                      | default        | default        | default                    | default       | 2                           |
| 24                      | default        | default        | default                    | default       | 3                           |
| 25                      | default        | default        | default                    | default       | 4                           |
| 26                      | default        | default        | default                    | default       | 5                           |
| 27                      | default        | default        | default                    | default       | 6                           |
| 28                      | default        | default        | default                    | default       | 8                           |
| 29                      | default        | default        | default                    | default       | 9                           |
| 30                      | 0.75           | 1              | 0.88                       | default       | 4                           |
| 32                      | 0.75           | 1              | 0.88                       | default       | 8                           |
| 33                      | 0.75           | 1              | 0.88                       | default       | 10                          |
| 34                      | 0.7            | 1              | 0.92                       | default       | 4                           |
| 35                      | default        | default        | 0.92                       | default       | 4                           |

**Table S3.** Table of the temporally and globally averaged results  $\pm$  inter annual variability as standard deviation of the CTRL and 35 Simulations with varying tuning parameters (1990 to 2010). Simulation 1 (EMAC/SRF) is performed with the SURFACE submodel, while simulation 2 to 35 are performed with the JSBACH submodel. Additionally, the corresponding reanalysis or observational results are listed as "REF". For precipitation REF refers to the GPCP monthly precipitation dataset (Adler et al. (2003)), while for the remaining variables REF refers to ERA5/ERA5-Land reanalysis datasets (Hersbach (2023);Muñoz Sabater(2019,2021)). The simulation with the parameters used for the EMAC/JSBACH setup is indicated in bold.

| Run                     | LST<br>[K]    | TOA <sub>net</sub><br>[W m <sup>-2</sup> ] | TOA <sub>sw</sub><br>[W m <sup>-2</sup> ] | TOA <sub>lw</sub><br>[W m <sup>-2</sup> ] | SRF <sub>net</sub><br>[W m <sup>-2</sup> ] | SRF <sub>sw</sub><br>[W m <sup>-2</sup> ] | SRF <sub>lw</sub><br>[W m <sup>-2</sup> ] | HFLX <sub>net</sub><br>[W m <sup>-2</sup> ] | HFLX <sub>sensible</sub><br>[W m <sup>-2</sup> ] | HFLX <sub>latent</sub><br>[W m <sup>-2</sup> ] | Precip<br>[mm day <sup>-1</sup> ] | ACLC              | LWC<br>[kg m <sup>-2</sup> ] | IWC<br>[kg m <sup>-2</sup> ] | TWS<br>[m]        |
|-------------------------|---------------|--------------------------------------------|-------------------------------------------|-------------------------------------------|--------------------------------------------|-------------------------------------------|-------------------------------------------|---------------------------------------------|--------------------------------------------------|------------------------------------------------|-----------------------------------|-------------------|------------------------------|------------------------------|-------------------|
| REF                     | 282.25 ± 0.27 | 0.45 ± 0.65                                | 242.67 ± 0.65                             | -242.22 ± 0.29                            | 105.91 ± 0.45                              | 163.76 ± 0.54                             | -57.85 ± 0.31                             | -69.92 ± 0.57                               | -28.15 ± 0.68                                    | -41.76 ± 0.43                                  | 2.7 ± 0.03                        | 0.553 ± 0.00405   | 0.04707 ± 0.00098            | 0.02166 ± 0.00033            | 1.06012 ± 0.00947 |
| 1 (EMAC/SRF)            | 283.09 ± 0.27 | 3.56 ± 0.39                                | 234.33 ± 0.27                             | -230.77 ± 0.34                            | 107.92 ± 0.24                              | 161.74 ± 0.31                             | -53.83 ± 0.3                              | -104.24 ± 0.35                              | -16.74 ± 0.18                                    | -87.5 ± 0.42                                   | 2.83 ± 0.02                       | 1.06067 ± 0.00444 | 0.10394 ± 0.00115            | 0.04972 ± 0.00068            | 0.34995 ± 0.00425 |
| <b>2 (CTRL)</b>         | 280.66 ± 0.26 | 6.61 ± 0.5                                 | 237.22 ± 0.3                              | -230.61 ± 0.42                            | 108.08 ± 0.28                              | 165.97 ± 0.36                             | -57.88 ± 0.35                             | -110.92 ± 0.65                              | -11.59 ± 0.15                                    | -99.33 ± 0.6                                   | 2.77 ± 0.02                       | 0.6462 ± 0.0025   | 0.09594 ± 0.00114            | 0.04945 ± 0.00067            | 1.00362 ± 0.00761 |
| 3                       | 280.54 ± 0.28 | 5.06 ± 0.51                                | 235.54 ± 0.29                             | -230.48 ± 0.38                            | 106.76 ± 0.25                              | 164.66 ± 0.39                             | -57.91 ± 0.43                             | -111.01 ± 0.59                              | -11.7 ± 0.16                                     | -99.31 ± 0.55                                  | 2.77 ± 0.02                       | 0.6466 ± 0.0025   | 0.0959 ± 0.00159             | 0.04976 ± 0.00066            | 1.00345 ± 0.00823 |
| 4                       | 280.66 ± 0.26 | 6.61 ± 0.5                                 | 237.22 ± 0.3                              | -230.61 ± 0.42                            | 108.08 ± 0.28                              | 165.97 ± 0.36                             | -57.88 ± 0.35                             | -110.92 ± 0.65                              | -11.59 ± 0.15                                    | -99.33 ± 0.6                                   | 2.77 ± 0.02                       | 0.6462 ± 0.0025   | 0.09594 ± 0.00114            | 0.04945 ± 0.00067            | 1.00362 ± 0.00761 |
| 5                       | 280.73 ± 0.27 | 8.06 ± 0.43                                | 238.78 ± 0.31                             | -230.72 ± 0.37                            | 109.31 ± 0.26                              | 167.24 ± 0.38                             | -57.93 ± 0.36                             | -110.81 ± 0.64                              | -11.6 ± 0.12                                     | -99.21 ± 0.62                                  | 2.76 ± 0.02                       | 0.646 ± 0.0022    | 0.09552 ± 0.00114            | 0.04936 ± 0.00063            | 1.00336 ± 0.00878 |
| 6                       | 280.85 ± 0.29 | 8.63 ± 0.53                                | 239.5 ± 0.31                              | -230.87 ± 0.39                            | 109.92 ± 0.25                              | 167.76 ± 0.4                              | -57.83 ± 0.37                             | -110.84 ± 0.64                              | -11.6 ± 0.15                                     | -99.24 ± 0.65                                  | 2.76 ± 0.02                       | 0.6453 ± 0.0022   | 0.09582 ± 0.00127            | 0.04919 ± 0.00059            | 1.0033 ± 0.0086   |
| 7                       | 280.6 ± 0.29  | 6.67 ± 0.42                                | 237.87 ± 0.35                             | -231.2 ± 0.41                             | 108.53 ± 0.32                              | 166.66 ± 0.39                             | -58.14 ± 0.37                             | -111.28 ± 0.61                              | -11.72 ± 0.14                                    | -99.56 ± 0.59                                  | 2.77 ± 0.02                       | 0.6465 ± 0.0027   | 0.09529 ± 0.00098            | 0.04955 ± 0.00061            | 1.00326 ± 0.00943 |
| 8                       | 280.66 ± 0.26 | 6.61 ± 0.5                                 | 237.22 ± 0.3                              | -230.61 ± 0.42                            | 108.08 ± 0.28                              | 165.97 ± 0.36                             | -57.88 ± 0.35                             | -110.92 ± 0.65                              | -11.59 ± 0.15                                    | -99.33 ± 0.6                                   | 2.77 ± 0.02                       | 0.6462 ± 0.0025   | 0.09594 ± 0.00114            | 0.04945 ± 0.00067            | 1.00362 ± 0.00761 |
| 9                       | 280.73 ± 0.27 | 6.35 ± 0.42                                | 236.5 ± 0.24                              | -230.15 ± 0.34                            | 107.56 ± 0.26                              | 165.2 ± 0.3                               | -57.64 ± 0.35                             | -110.55 ± 0.6                               | -11.58 ± 0.11                                    | -98.97 ± 0.58                                  | 2.76 ± 0.02                       | 0.6462 ± 0.0018   | 0.09652 ± 0.00112            | 0.04933 ± 0.00055            | 1.0034 ± 0.00672  |
| 10                      | 280.73 ± 0.27 | 6.48 ± 0.46                                | 236.0 ± 0.31                              | -229.52 ± 0.45                            | 107.19 ± 0.29                              | 164.69 ± 0.34                             | -57.5 ± 0.33                              | -110.04 ± 0.59                              | -11.55 ± 0.14                                    | -98.48 ± 0.58                                  | 2.74 ± 0.02                       | 0.6465 ± 0.0028   | 0.09637 ± 0.00111            | 0.04942 ± 0.00057            | 1.00328 ± 0.00819 |
| 11                      | 280.75 ± 0.26 | 6.34 ± 0.49                                | 235.32 ± 0.36                             | -228.98 ± 0.33                            | 106.71 ± 0.31                              | 163.97 ± 0.43                             | -57.26 ± 0.39                             | -109.6 ± 0.58                               | -11.49 ± 0.14                                    | -98.1 ± 0.55                                   | 2.73 ± 0.02                       | 0.6474 ± 0.0024   | 0.09708 ± 0.00096            | 0.049 ± 0.00052              | 1.00239 ± 0.00791 |
| 12                      | 280.58 ± 0.28 | 5.66 ± 0.44                                | 236.32 ± 0.32                             | -230.65 ± 0.39                            | 106.91 ± 0.33                              | 164.94 ± 0.37                             | -58.02 ± 0.35                             | -110.57 ± 0.62                              | -11.59 ± 0.17                                    | -98.97 ± 0.61                                  | 2.76 ± 0.02                       | 0.6456 ± 0.0026   | 0.09557 ± 0.00096            | 0.04952 ± 0.00049            | 1.00348 ± 0.00838 |
| 13                      | 280.57 ± 0.28 | 4.84 ± 0.42                                | 235.5 ± 0.34                              | -230.67 ± 0.35                            | 106.06 ± 0.27                              | 164.01 ± 0.43                             | -57.95 ± 0.4                              | -110.55 ± 0.54                              | -11.63 ± 0.17                                    | -98.93 ± 0.53                                  | 2.76 ± 0.02                       | 0.6455 ± 0.0031   | 0.09529 ± 0.00108            | 0.04946 ± 0.00061            | 1.00356 ± 0.00795 |
| 14                      | 280.53 ± 0.28 | 4.4 ± 0.47                                 | 235.04 ± 0.3                              | -230.64 ± 0.39                            | 105.67 ± 0.24                              | 163.47 ± 0.38                             | -57.8 ± 0.36                              | -110.57 ± 0.59                              | -11.65 ± 0.13                                    | -98.92 ± 0.57                                  | 2.76 ± 0.02                       | 0.6462 ± 0.0027   | 0.09533 ± 0.00104            | 0.04946 ± 0.00058            | 1.00368 ± 0.0075  |
| 15                      | 280.55 ± 0.26 | 3.48 ± 0.39                                | 234.1 ± 0.37                              | -230.62 ± 0.41                            | 104.62 ± 0.29                              | 162.42 ± 0.44                             | -57.79 ± 0.39                             | -110.5 ± 0.67                               | -11.57 ± 0.13                                    | -98.93 ± 0.63                                  | 2.76 ± 0.02                       | 0.6457 ± 0.0035   | 0.09531 ± 0.00098            | 0.04942 ± 0.00049            | 1.00327 ± 0.00821 |
| <b>16 (EMAC/JSBACH)</b> | 280.48 ± 0.23 | 3.23 ± 0.38                                | 233.86 ± 0.29                             | -230.63 ± 0.38                            | 104.43 ± 0.3                               | 162.14 ± 0.34                             | -57.71 ± 0.35                             | -110.47 ± 0.67                              | -11.67 ± 0.14                                    | -98.79 ± 0.61                                  | 2.76 ± 0.02                       | 0.6464 ± 0.0028   | 0.09519 ± 0.0009             | 0.04936 ± 0.00054            | 1.00385 ± 0.00815 |
| 17                      | 280.6 ± 0.23  | 3.89 ± 0.46                                | 234.27 ± 0.31                             | -230.38 ± 0.37                            | 105.94 ± 0.28                              | 162.71 ± 0.38                             | -56.77 ± 0.37                             | -111.4 ± 0.58                               | -11.82 ± 0.14                                    | -99.58 ± 0.55                                  | 2.78 ± 0.02                       | 0.6578 ± 0.0025   | 0.09687 ± 0.00121            | 0.04916 ± 0.00063            | 1.00379 ± 0.00819 |
| 18                      | 280.63 ± 0.23 | 4.81 ± 0.4                                 | 235.27 ± 0.33                             | -230.46 ± 0.37                            | 106.67 ± 0.27                              | 163.83 ± 0.41                             | -57.16 ± 0.41                             | -111.22 ± 0.6                               | -11.78 ± 0.15                                    | -99.44 ± 0.58                                  | 2.77 ± 0.02                       | 0.654 ± 0.0027    | 0.09656 ± 0.00118            | 0.04918 ± 0.0006             | 1.00344 ± 0.00751 |
| 19                      | 280.64 ± 0.21 | 5.59 ± 0.44                                | 236.14 ± 0.29                             | -230.56 ± 0.42                            | 107.32 ± 0.24                              | 164.77 ± 0.41                             | -57.45 ± 0.44                             | -111.11 ± 0.67                              | -11.72 ± 0.16                                    | -99.39 ± 0.63                                  | 2.77 ± 0.02                       | 0.6506 ± 0.0026   | 0.09622 ± 0.00136            | 0.04941 ± 0.00068            | 1.00382 ± 0.0075  |
| 20                      | 280.66 ± 0.26 | 6.61 ± 0.5                                 | 237.22 ± 0.3                              | -230.61 ± 0.42                            | 108.08 ± 0.28                              | 165.97 ± 0.36                             | -57.88 ± 0.35                             | -110.92 ± 0.65                              | -11.59 ± 0.15                                    | -99.33 ± 0.6                                   | 2.77 ± 0.02                       | 0.6462 ± 0.0025   | 0.09594 ± 0.00114            | 0.04945 ± 0.00067            | 1.00362 ± 0.00761 |
| 21                      | 280.69 ± 0.28 | 7.64 ± 0.37                                | 238.32 ± 0.24                             | -230.68 ± 0.34                            | 108.9 ± 0.26                               | 167.18 ± 0.27                             | -58.27 ± 0.32                             | -110.69 ± 0.61                              | -11.6 ± 0.17                                     | -99.09 ± 0.61                                  | 2.76 ± 0.02                       | 0.6424 ± 0.0025   | 0.09519 ± 0.00094            | 0.04968 ± 0.00063            | 1.00316 ± 0.00774 |
| 22                      | 280.66 ± 0.26 | 6.61 ± 0.5                                 | 237.22 ± 0.3                              | -230.61 ± 0.42                            | 108.08 ± 0.28                              | 165.97 ± 0.36                             | -57.88 ± 0.35                             | -110.92 ± 0.65                              | -11.59 ± 0.15                                    | -99.33 ± 0.6                                   | 2.77 ± 0.02                       | 0.6462 ± 0.0025   | 0.09594 ± 0.00114            | 0.04945 ± 0.00067            | 1.00362 ± 0.00761 |
| 23                      | 280.49 ± 0.26 | 6.85 ± 0.48                                | 241.36 ± 0.35                             | -234.51 ± 0.32                            | 111.04 ± 0.22                              | 170.57 ± 0.48                             | -59.53 ± 0.48                             | -113.5 ± 0.66                               | -11.91 ± 0.13                                    | -101.59 ± 0.63                                 | 2.84 ± 0.02                       | 0.6267 ± 0.0029   | 0.08383 ± 0.00098            | 0.03996 ± 0.00057            | 1.00189 ± 0.00737 |
| 24                      | 280.41 ± 0.22 | 6.29 ± 0.41                                | 242.5 ± 0.28                              | -236.21 ± 0.33                            | 111.74 ± 0.26                              | 171.84 ± 0.35                             | -60.09 ± 0.36                             | -114.76 ± 0.56                              | -12.06 ± 0.12                                    | -102.7 ± 0.57                                  | 2.87 ± 0.02                       | 0.619 ± 0.0026    | 0.07962 ± 0.00066            | 0.0366 ± 0.00056             | 1.0015 ± 0.00797  |
| 25                      | 280.4 ± 0.27  | 5.88 ± 0.43                                | 243.13 ± 0.32                             | -237.25 ± 0.33                            | 112.06 ± 0.23                              | 172.56 ± 0.46                             | -60.51 ± 0.48                             | -115.45 ± 0.65                              | -12.16 ± 0.14                                    | -103.29 ± 0.63                                 | 2.89 ± 0.02                       | 0.6133 ± 0.0028   | 0.07735 ± 0.00073            | 0.0349 ± 0.00056             | 1.00089 ± 0.00818 |
| 26                      | 280.35 ± 0.26 | 5.59 ± 0.39                                | 243.44 ± 0.29                             | -237.85 ± 0.36                            | 112.25 ± 0.25                              | 172.9 ± 0.37                              | -60.65 ± 0.35                             | -115.92 ± 0.59                              | -12.18 ± 0.1                                     | -103.74 ± 0.61                                 | 2.91 ± 0.02                       | 0.6099 ± 0.0026   | 0.07629 ± 0.00061            | 0.03385 ± 0.00087            | 1.00167 ± 0.00813 |
| 27                      | 280.34 ± 0.25 | 5.31 ± 0.38                                | 243.62 ± 0.31                             | -238.31 ± 0.29                            | 112.33 ± 0.24                              | 173.11 ± 0.41                             | -60.78 ± 0.43                             | -116.21 ± 0.56                              | -12.26 ± 0.13                                    | -103.95 ± 0.6                                  | 2.92 ± 0.02                       | 0.6069 ± 0.0034   | 0.07533 ± 0.00071            | 0.03305 ± 0.00042            | 1.0011 ± 0.00768  |
| 28                      | 280.28 ± 0.28 | 5.11 ± 0.37                                | 243.93 ± 0.37                             | -238.82 ± 0.28                            | 112.48 ± 0.26                              | 173.47 ± 0.47                             | -60.99 ± 0.47                             | -116.58 ± 0.61                              | -12.36 ± 0.16                                    | -104.22 ± 0.61                                 | 2.92 ± 0.02                       | 0.6036 ± 0.0033   | 0.07422 ± 0.00081            | 0.03216 ± 0.00043            | 1.00115 ± 0.00858 |
| 29                      | 280.32 ± 0.3  | 4.95 ± 0.43                                | 244.0 ± 0.35                              | -239.05 ± 0.35                            | 112.49 ± 0.27                              | 173.54 ± 0.46                             | -61.05 ± 0.45                             | -116.73 ± 0.59                              | -12.32 ± 0.18                                    | -104.41 ± 0.58                                 | 2.93 ± 0.02                       | 0.6018 ± 0.0033   | 0.07398 ± 0.00073            | 0.03186 ± 0.00042            | 1.00108 ± 0.00824 |
| 30                      | 280.17 ± 0.31 | 0.54 ± 0.41                                | 236.07 ± 0.28                             | -235.53 ± 0.36                            | 105.78 ± 0.26                              | 165.57 ± 0.35                             | -59.79 ± 0.39                             | -114.13 ± 0.62                              | -11.99 ± 0.14                                    | -102.14 ± 0.61                                 | 2.87 ± 0.02                       | 0.6146 ± 0.0025   | 0.07776 ± 0.00067            | 0.03467 ± 0.0005             | 1.00037 ± 0.00886 |
| 32                      | 280.08 ± 0.28 | -0.08 ± 0.43                               | 237.09 ± 0.34                             | -237.17 ± 0.27                            | 106.35 ± 0.23                              | 166.66 ± 0.46                             | -60.31 ± 0.47                             | -115.27 ± 0.55                              | -12.13 ± 0.13                                    | -103.13 ± 0.6                                  | 2.9 ± 0.02                        | 0.6062 ± 0.0024   | 0.07447 ± 0.0008             | 0.03201 ± 0.00055            | 1.00072 ± 0.00858 |
| 33                      | 280.07 ± 0.28 | -0.19 ± 0.45                               | 237.34 ± 0.42                             | -237.52 ± 0.35                            | 106.52 ± 0.29                              | 166.92 ± 0.52                             | -60.4 ± 0.42                              | -115.57 ± 0.61                              | -12.16 ± 0.14                                    | -103.41 ± 0.58                                 | 2.91 ± 0.02                       | 0.6028 ± 0.0037   | 0.07393 ± 0.00063            | 0.03153 ± 0.00041            | 1.00103 ± 0.00849 |
| 34                      | 280.06 ± 0.25 | -0.89 ± 0.36                               | 234.44 ± 0.36                             | -235.33 ± 0.35                            | 104.42 ± 0.28                              | 164.15 ± 0.44                             | -59.73 ± 0.41                             | -114.11 ± 0.54                              | -12.01 ± 0.16                                    | -102.09 ± 0.52                                 | 2.87 ± 0.01                       | 0.6168 ± 0.0031   | 0.07773 ± 0.00069            | 0.03483 ± 0.0005             | 1.00153 ± 0.00794 |
| 35                      | 280.21 ± 0.25 | 2.53 ± 0.44                                | 239.73 ± 0.39                             | -237.2 ± 0.33                             | 108.41 ± 0.26                              | 168.65 ± 0.51                             | -60.24 ± 0.44                             | -114.97 ± 0.58                              | -12.15 ± 0.13                                    | -102.82 ± 0.58                                 | 2.88 ± 0.02                       | 0.6129 ± 0.003    | 0.0771 ± 0.00081             | 0.03461 ± 0.00046            | 1.00171 ± 0.00781 |

**Table S4.** Root mean square error (RMSE) and normalised RMSE by the range of the reference data (NRMSE) of reference data minus simulation for the analysed time period (1990 to 2010).

| Run                           | LST<br>[K]   | TOA <sub>net</sub><br>[W m <sup>-2</sup> ] | TOA <sub>sw</sub><br>[W m <sup>-2</sup> ] | TOA <sub>lw</sub><br>[W m <sup>-2</sup> ] | SRF <sub>net</sub><br>[W m <sup>-2</sup> ] | SRF <sub>sw</sub><br>[W m <sup>-2</sup> ] | SRF <sub>lw</sub><br>[W m <sup>-2</sup> ] | HFLX <sub>net</sub><br>[W m <sup>-2</sup> ] | HFLX <sub>cosensible</sub><br>[W m <sup>-2</sup> ] | HFLX <sub>lat-out</sub><br>[W m <sup>-2</sup> ] | Precip<br>[mm day <sup>-1</sup> ] | ACLC         | LWC<br>[kg m <sup>-2</sup> ] | IWC<br>[kg m <sup>-2</sup> ] | TWS<br>[m]   |
|-------------------------------|--------------|--------------------------------------------|-------------------------------------------|-------------------------------------------|--------------------------------------------|-------------------------------------------|-------------------------------------------|---------------------------------------------|----------------------------------------------------|-------------------------------------------------|-----------------------------------|--------------|------------------------------|------------------------------|--------------|
| 2 (CTRL) RMSE                 | 4.88         | 9.044                                      | 7.131                                     | 11.839                                    | 5.6                                        | 5.441                                     | 0.909                                     | 42.858                                      | 5.205                                              | 15.966                                          | 0.092                             | 0.02         | 0.042                        | 0.027                        | 0.06         |
| 2 (CTRL) NRMSE                | 0.349        | 0.411                                      | 0.411                                     | 1.535                                     | 0.308                                      | 0.312                                     | 0.209                                     | 1.129                                       | 1.136                                              | 1.227                                           | 0.28                              | 0.554        | 2.936                        | 10.765                       | 0.66         |
| 3 RMSE                        | 4.919        | 8.068                                      | 8.49                                      | 11.971                                    | 5.228                                      | 5.055                                     | 0.942                                     | 42.944                                      | 5.101                                              | 15.948                                          | 0.097                             | 0.02         | 0.042                        | 0.028                        | 0.06         |
| 3 NRMSE                       | 0.351        | 0.366                                      | 0.49                                      | 1.552                                     | 0.288                                      | 0.29                                      | 0.217                                     | 1.132                                       | 1.114                                              | 1.226                                           | 0.295                             | 0.564        | 2.934                        | 10.888                       | 0.663        |
| 4 RMSE                        | 4.88         | 9.044                                      | 7.131                                     | 11.839                                    | 5.6                                        | 5.441                                     | 0.909                                     | 42.858                                      | 5.205                                              | 15.966                                          | 0.092                             | 0.02         | 0.042                        | 0.027                        | 0.06         |
| 4 NRMSE                       | 0.349        | 0.411                                      | 0.411                                     | 1.535                                     | 0.308                                      | 0.312                                     | 0.209                                     | 1.129                                       | 1.136                                              | 1.227                                           | 0.28                              | 0.554        | 2.936                        | 10.765                       | 0.66         |
| 5 RMSE                        | 4.856        | 10.086                                     | 6.024                                     | 11.731                                    | 6.18                                       | 6.069                                     | 0.915                                     | 42.753                                      | 5.189                                              | 15.844                                          | 0.086                             | 0.019        | 0.042                        | 0.027                        | 0.06         |
| 5 NRMSE                       | 0.347        | 0.458                                      | 0.348                                     | 1.521                                     | 0.34                                       | 0.348                                     | 0.21                                      | 1.127                                       | 1.133                                              | 1.218                                           | 0.261                             | 0.548        | 2.907                        | 10.727                       | 0.664        |
| 6 RMSE                        | 4.822        | 10.524                                     | 5.586                                     | 11.58                                     | 6.537                                      | 6.382                                     | 0.917                                     | 42.781                                      | 5.198                                              | 15.882                                          | 0.088                             | 0.019        | 0.042                        | 0.027                        | 0.06         |
| 6 NRMSE                       | 0.345        | 0.478                                      | 0.322                                     | 1.501                                     | 0.36                                       | 0.366                                     | 0.211                                     | 1.127                                       | 1.135                                              | 1.221                                           | 0.268                             | 0.53         | 2.928                        | 10.661                       | 0.665        |
| 7 RMSE                        | 4.9          | 9.08                                       | 6.651                                     | 11.261                                    | 5.789                                      | 5.76                                      | 0.961                                     | 43.206                                      | 5.073                                              | 16.191                                          | 0.099                             | 0.02         | 0.027                        | 0.042                        | 0.06         |
| 7 NRMSE                       | 0.35         | 0.412                                      | 0.384                                     | 1.46                                      | 0.319                                      | 0.33                                      | 0.221                                     | 1.139                                       | 1.108                                              | 1.245                                           | 0.3                               | 0.562        | 2.891                        | 10.802                       | 0.667        |
| 8 RMSE                        | 4.88         | 9.044                                      | 7.131                                     | 11.839                                    | 5.6                                        | 5.441                                     | 0.909                                     | 42.858                                      | 5.205                                              | 15.966                                          | 0.092                             | 0.02         | 0.042                        | 0.027                        | 0.06         |
| 8 NRMSE                       | 0.349        | 0.411                                      | 0.411                                     | 1.535                                     | 0.308                                      | 0.312                                     | 0.209                                     | 1.129                                       | 1.136                                              | 1.227                                           | 0.28                              | 0.554        | 2.936                        | 10.765                       | 0.66         |
| 9 RMSE                        | 4.858        | 8.864                                      | 7.698                                     | 12.292                                    | 5.417                                      | 5.172                                     | 0.935                                     | 42.505                                      | 5.215                                              | 15.614                                          | 0.087                             | 0.02         | 0.043                        | 0.027                        | 0.06         |
| 9 NRMSE                       | 0.347        | 0.403                                      | 0.444                                     | 1.593                                     | 0.298                                      | 0.296                                     | 0.215                                     | 1.12                                        | 1.139                                              | 1.2                                             | 0.264                             | 0.554        | 2.976                        | 10.716                       | 0.661        |
| 10 RMSE                       | 4.858        | 8.95                                       | 8.106                                     | 12.909                                    | 5.318                                      | 5.058                                     | 0.968                                     | 42.013                                      | 5.241                                              | 15.133                                          | 0.076                             | 0.02         | 0.043                        | 0.027                        | 0.06         |
| 10 NRMSE                      | 0.347        | 0.406                                      | 0.468                                     | 1.674                                     | 0.293                                      | 0.29                                      | 0.222                                     | 1.107                                       | 1.144                                              | 1.163                                           | 0.232                             | 0.562        | 2.965                        | 10.751                       | 0.664        |
| 11 RMSE                       | 4.851        | 8.861                                      | 8.676                                     | 13.442                                    | 5.223                                      | 4.981                                     | 1.098                                     | 41.593                                      | 5.297                                              | 14.757                                          | 0.07                              | 0.021        | 0.043                        | 0.027                        | 0.061        |
| 11 NRMSE                      | 0.347        | 0.402                                      | 0.501                                     | 1.743                                     | 0.288                                      | 0.285                                     | 0.252                                     | 1.096                                       | 1.157                                              | 1.134                                           | 0.213                             | 0.585        | 3.014                        | 10.584                       | 0.673        |
| 12 RMSE                       | 4.904        | 8.424                                      | 7.847                                     | 11.798                                    | 5.259                                      | 5.11                                      | 0.925                                     | 42.521                                      | 5.201                                              | 15.616                                          | 0.087                             | 0.019        | 0.042                        | 0.027                        | 0.06         |
| 12 NRMSE                      | 0.35         | 0.383                                      | 0.453                                     | 1.529                                     | 0.29                                       | 0.293                                     | 0.213                                     | 1.121                                       | 1.135                                              | 1.2                                             | 0.265                             | 0.538        | 2.91                         | 10.789                       | 0.663        |
| 13 RMSE                       | 4.909        | 7.938                                      | 8.519                                     | 11.782                                    | 5.161                                      | 4.983                                     | 0.932                                     | 42.506                                      | 5.167                                              | 15.565                                          | 0.085                             | 0.019        | 0.042                        | 0.027                        | 0.06         |
| 13 NRMSE                      | 0.351        | 0.36                                       | 0.491                                     | 1.527                                     | 0.284                                      | 0.285                                     | 0.214                                     | 1.12                                        | 1.128                                              | 1.196                                           | 0.26                              | 0.535        | 2.891                        | 10.766                       | 0.661        |
| 14 RMSE                       | 4.925        | 7.706                                      | 8.913                                     | 11.809                                    | 5.162                                      | 4.98                                      | 0.914                                     | 42.523                                      | 5.147                                              | 15.564                                          | 0.086                             | 0.02         | 0.042                        | 0.027                        | 0.06         |
| 14 NRMSE                      | 0.352        | 0.35                                       | 0.514                                     | 1.531                                     | 0.284                                      | 0.285                                     | 0.21                                      | 1.121                                       | 1.124                                              | 1.196                                           | 0.263                             | 0.554        | 2.894                        | 10.767                       | 0.659        |
| 15 RMSE                       | 4.916        | 7.277                                      | 9.732                                     | 11.834                                    | 5.317                                      | 5.154                                     | 0.926                                     | 42.457                                      | 5.219                                              | 15.569                                          | 0.085                             | 0.019        | 0.042                        | 0.027                        | 0.06         |
| 15 NRMSE                      | 0.351        | 0.33                                       | 0.561                                     | 1.534                                     | 0.293                                      | 0.295                                     | 0.213                                     | 1.119                                       | 1.139                                              | 1.197                                           | 0.257                             | 0.541        | 2.892                        | 10.75                        | 0.665        |
| <b>16 (EMAC/JSBACH) RMSE</b>  | <b>4.939</b> | <b>7.175</b>                               | <b>9.943</b>                              | <b>11.822</b>                             | <b>5.367</b>                               | <b>5.225</b>                              | <b>0.919</b>                              | <b>42.426</b>                               | <b>5.123</b>                                       | <b>15.439</b>                                   | <b>0.084</b>                      | <b>0.02</b>  | <b>0.042</b>                 | <b>0.027</b>                 | <b>0.06</b>  |
| <b>16 (EMAC/JSBACH) NRMSE</b> | <b>0.353</b> | <b>0.326</b>                               | <b>0.574</b>                              | <b>1.533</b>                              | <b>0.296</b>                               | <b>0.299</b>                              | <b>0.211</b>                              | <b>1.118</b>                                | <b>1.118</b>                                       | <b>1.187</b>                                    | <b>0.255</b>                      | <b>0.559</b> | <b>2.884</b>                 | <b>10.728</b>                | <b>0.658</b> |
| 17 RMSE                       | 4.897        | 7.46                                       | 9.58                                      | 12.068                                    | 5.159                                      | 5.08                                      | 1.414                                     | 43.32                                       | 4.976                                              | 16.21                                           | 0.102                             | 0.031        | 0.043                        | 0.027                        | 0.06         |
| 17 NRMSE                      | 0.35         | 0.339                                      | 0.553                                     | 1.564                                     | 0.284                                      | 0.291                                     | 0.325                                     | 1.142                                       | 1.086                                              | 1.246                                           | 0.311                             | 0.867        | 3.001                        | 10.651                       | 0.659        |
| 18 RMSE                       | 4.886        | 7.923                                      | 8.713                                     | 11.983                                    | 5.215                                      | 4.976                                     | 1.159                                     | 43.144                                      | 5.019                                              | 16.072                                          | 0.098                             | 0.027        | 0.043                        | 0.027                        | 0.06         |
| 18 NRMSE                      | 0.349        | 0.36                                       | 0.503                                     | 1.553                                     | 0.287                                      | 0.285                                     | 0.267                                     | 1.137                                       | 1.096                                              | 1.235                                           | 0.296                             | 0.763        | 2.979                        | 10.657                       | 0.662        |
| 19 RMSE                       | 4.881        | 8.376                                      | 7.986                                     | 11.892                                    | 5.349                                      | 5.078                                     | 1.03                                      | 43.044                                      | 5.074                                              | 16.026                                          | 0.097                             | 0.024        | 0.043                        | 0.027                        | 0.06         |
| 19 NRMSE                      | 0.349        | 0.38                                       | 0.461                                     | 1.542                                     | 0.295                                      | 0.291                                     | 0.237                                     | 1.134                                       | 1.108                                              | 1.232                                           | 0.296                             | 0.671        | 2.956                        | 10.749                       | 0.658        |
| 20 RMSE                       | 4.88         | 9.044                                      | 7.131                                     | 11.839                                    | 5.6                                        | 5.441                                     | 0.909                                     | 42.858                                      | 5.205                                              | 15.966                                          | 0.092                             | 0.02         | 0.042                        | 0.027                        | 0.06         |
| 20 NRMSE                      | 0.349        | 0.411                                      | 0.411                                     | 1.535                                     | 0.308                                      | 0.312                                     | 0.209                                     | 1.129                                       | 1.136                                              | 1.227                                           | 0.28                              | 0.554        | 2.936                        | 10.765                       | 0.66         |
| 21 RMSE                       | 4.869        | 9.771                                      | 6.328                                     | 11.77                                     | 5.967                                      | 6.029                                     | 0.991                                     | 42.64                                       | 5.193                                              | 15.73                                           | 0.086                             | 0.016        | 0.042                        | 0.027                        | 0.06         |
| 21 NRMSE                      | 0.348        | 0.444                                      | 0.365                                     | 1.526                                     | 0.329                                      | 0.345                                     | 0.228                                     | 1.124                                       | 1.134                                              | 1.209                                           | 0.261                             | 0.455        | 2.883                        | 10.853                       | 0.665        |
| 22 RMSE                       | 4.88         | 9.044                                      | 7.131                                     | 11.839                                    | 5.6                                        | 5.441                                     | 0.909                                     | 42.858                                      | 5.205                                              | 15.966                                          | 0.092                             | 0.02         | 0.042                        | 0.027                        | 0.06         |
| 22 NRMSE                      | 0.349        | 0.411                                      | 0.411                                     | 1.535                                     | 0.308                                      | 0.312                                     | 0.209                                     | 1.129                                       | 1.136                                              | 1.227                                           | 0.28                              | 0.554        | 2.936                        | 10.765                       | 0.66         |
| 23 RMSE                       | 4.935        | 9.206                                      | 4.79                                      | 8.052                                     | 7.276                                      | 8.439                                     | 1.936                                     | 45.337                                      | 4.89                                               | 18.198                                          | 0.151                             | 0.007        | 0.03                         | 0.018                        | 0.061        |
| 23 NRMSE                      | 0.353        | 0.418                                      | 0.276                                     | 1.044                                     | 0.401                                      | 0.483                                     | 0.445                                     | 1.195                                       | 1.068                                              | 1.399                                           | 0.458                             | 0.198        | 2.099                        | 7.021                        | 0.678        |
| 24 RMSE                       | 4.965        | 8.823                                      | 4.604                                     | 6.443                                     | 7.79                                       | 9.486                                     | 2.422                                     | 46.54                                       | 4.746                                              | 19.287                                          | 0.184                             | 0.011        | 0.026                        | 0.014                        | 0.062        |
| 24 NRMSE                      | 0.355        | 0.401                                      | 0.266                                     | 0.835                                     | 0.429                                      | 0.543                                     | 0.557                                     | 1.226                                       | 1.036                                              | 1.483                                           | 0.559                             | 0.316        | 1.809                        | 5.697                        | 0.683        |
| 25 RMSE                       | 4.969        | 8.561                                      | 4.626                                     | 5.488                                     | 8.026                                      | 10.118                                    | 2.827                                     | 47.213                                      | 4.649                                              | 19.878                                          | 0.203                             | 0.016        | 0.024                        | 0.013                        | 0.062        |
| 25 NRMSE                      | 0.355        | 0.389                                      | 0.267                                     | 0.711                                     | 0.442                                      | 0.579                                     | 0.65                                      | 1.244                                       | 1.015                                              | 1.528                                           | 0.615                             | 0.453        | 1.653                        | 5.024                        | 0.689        |
| 26 RMSE                       | 4.987        | 8.377                                      | 4.666                                     | 4.949                                     | 8.176                                      | 10.407                                    | 2.944                                     | 47.659                                      | 4.635                                              | 20.322                                          | 0.217                             | 0.019        | 0.023                        | 0.012                        | 0.062        |
| 26 NRMSE                      | 0.356        | 0.38                                       | 0.269                                     | 0.642                                     | 0.45                                       | 0.596                                     | 0.677                                     | 1.256                                       | 1.012                                              | 1.562                                           | 0.66                              | 0.541        | 1.58                         | 4.618                        | 0.681        |
| 27 RMSE                       | 4.992        | 8.209                                      | 4.7                                       | 4.545                                     | 8.235                                      | 10.59                                     | 3.077                                     | 47.941                                      | 4.557                                              | 20.531                                          | 0.226                             | 0.022        | 0.022                        | 0.011                        | 0.062        |
| 27 NRMSE                      | 0.357        | 0.373                                      | 0.271                                     | 0.589                                     | 0.453                                      | 0.607                                     | 0.707                                     | 1.263                                       | 0.995                                              | 1.578                                           | 0.686                             | 0.621        | 1.514                        | 4.293                        | 0.686        |
| 28 RMSE                       | 5.016        | 8.089                                      | 4.777                                     | 4.111                                     | 8.355                                      | 10.912                                    | 3.28                                      | 48.299                                      | 4.46                                               | 20.798                                          | 0.236                             | 0.025        | 0.021                        | 0.01                         | 0.062        |
| 28 NRMSE                      | 0.358        | 0.367                                      | 0.276                                     | 0.533                                     | 0.46                                       | 0.625                                     | 0.754                                     | 1.273                                       | 0.974                                              | 1.599                                           | 0.716                             | 0.709        | 1.438                        | 3.944                        | 0.687        |
| 29 RMSE                       | 5.001        | 8.001                                      | 4.794                                     | 3.931                                     | 8.362                                      | 10.975                                    | 3.338                                     | 48.444                                      | 4.494                                              | 20.98                                           | 0.24                              | 0.027        | 0.021                        | 0.01                         | 0.062        |
| 29 NRMSE                      | 0.357        | 0.363                                      | 0.277                                     | 0.51                                      | 0.46                                       | 0.629                                     | 0.767                                     | 1.277                                       | 0.981                                              | 1.613                                           | 0.73                              | 0.758        | 1.421                        | 3.825                        | 0.687        |
| 30 RMSE                       | 5.061        | 6.618                                      | 8.048                                     | 7.085                                     | 5.16                                       | 5.29                                      | 2.148                                     | 45.935                                      | 4.814                                              | 18.735                                          | 0.18                              | 0.015        | 0.024                        | 0.012                        | 0.063        |
| 30 NRMSE                      | 0.362        | 0.301                                      | 0.464                                     | 0.918                                     | 0.284                                      | 0.303                                     | 0.494                                     | 1.21                                        | 1.051                                              | 1.44                                            | 0.547                             | 0.42         | 1.681                        | 4.933                        | 0.696        |
| 32 RMSE                       | 5.096        | 6.641                                      | 7.234                                     | 5.55                                      | 5.176                                      | 5.763                                     | 2.639                                     | 47.032                                      | 4.675                                              | 19.72                                           | 0.213                             | 0.023        | 0.021                        | 0.01                         | 0.063        |
| 32 NRMSE                      | 0.364        | 0.302                                      | 0.417                                     | 0.72                                      | 0.285                                      | 0.33                                      | 0.607                                     | 1.239                                       | 1.021                                              | 1.516                                           | 0.646                             | 0.639        | 1.455                        | 3.888                        | 0.692        |
| 33 RMSE                       | 5.103        | 6.652                                      | 7.05                                      | 5.239                                     | 5.196                                      | 5.901                                     | 2.715                                     | 47.327                                      | 4.649                                              | 19.994                                          | 0.221                             | 0.026        | 0.02                         | 0.009                        | 0.062        |
| 33 NRMSE                      | 0.365        | 0.302                                      | 0.407                                     | 0.679                                     | 0.286                                      | 0.338                                     | 0.624                                     | 1.247                                       | 1.015                                              | 1.537                                           | 0.67                              | 0.731        | 1.417                        | 3.696                        | 0.688        |
| 34 RMSE                       | 5.106        | 6.75                                       | 9.431                                     | 7.269                                     | 5.368                                      | 4.993                                     | 2.097                                     | 45.914                                      | 4.795                                              | 18.691                                          | 0.182                             | 0.013        | 0.024                        | 0.013                        | 0.062        |
| 34 NRMSE                      | 0.365        | 0.307                                      | 0.544                                     | 0.942                                     | 0.296                                      | 0.286                                     | 0.482                                     | 1.21                                        | 1.047                                              | 1.437                                           | 0.554                             | 0.367        | 1.678                        | 4.995                        | 0.682        |
| 35 RMSE                       | 5.044        | 6.939                                      | 5.466                                     | 5.533                                     | 5.733                                      | 6.987                                     | 2.575                                     | 46.752                                      | 4.658                                              | 19.413                                          | 0.194                             | 0.016        | 0.024                        | 0.012                        | 0.062        |
| 35 NRMSE                      | 0.36         | 0.315                                      | 0.315                                     | 0.717                                     | 0.316                                      | 0.4                                       | 0.592                                     | 1.232                                       | 1.017                                              | 1.492                                           | 0.59                              | 0.463        | 1.636                        | 4.909                        | 0.68         |

**Table S5.** Selection of newly available output variables and diagnostics of the JSBACH submodel.

| <i>JSBACH Process</i>                              |                                                                                                                                          |
|----------------------------------------------------|------------------------------------------------------------------------------------------------------------------------------------------|
| Variable                                           | Additional information                                                                                                                   |
| <i>Radiation</i>                                   |                                                                                                                                          |
| Surface albedo                                     | Available in the visible and near infrared range for soil, snow, ice, water, canopy and separately for each Plant Functional Type (PFT). |
| Photosynthetic active radiation (PAR)              | Available are total, direct and diffuse parts for each canopy layer and PFT.                                                             |
| Fraction of absorbed PAR                           | Available are total, direct and diffuse parts for each canopy layer and PFT.                                                             |
| <i>Surface Energy Balance</i>                      |                                                                                                                                          |
| Surface temperature                                | Available for land, ice, water, snow, five soil and three snow levels.                                                                   |
| Sensible and latent heatflux                       | Available for land, ice and water.                                                                                                       |
| Heat capacity of soil                              | Available for land and water.                                                                                                            |
| <i>Turbulence</i>                                  |                                                                                                                                          |
| Surface roughness length                           | Available for Orography, momentum and heat. All are available for each PFT.                                                              |
| <i>Soil and Snow Energy</i>                        |                                                                                                                                          |
| Ground heat conductivity                           | Available for each soil and snow layer.                                                                                                  |
| Ground heat capacity                               | Available for each soil and snow layer.                                                                                                  |
| Ground heat flux                                   | Available for each soil and snow layer.                                                                                                  |
| Volumetric soil field capacity                     | Available for each soil layer.                                                                                                           |
| Volumetric porosity of ground                      | Available for each soil layer.                                                                                                           |
| Density of snow on soil                            | Available for each snow layer.                                                                                                           |
| Snow depth                                         | Available for each snow layer.                                                                                                           |
| Thawing depth                                      | Available for each snow layer.                                                                                                           |
| <i>Assimilation</i>                                |                                                                                                                                          |
| CO2 concentration at surface level                 |                                                                                                                                          |
| Dark respiration                                   | Available for each canopy level and PFT.                                                                                                 |
| <i>Disturbance</i>                                 |                                                                                                                                          |
| Fraction of burned foliage projective cover (FPC)  | Available for each PFT.                                                                                                                  |
| Fraction of damaged FPC from wind                  | Available for each PFT.                                                                                                                  |
| Amount of carbon relocated by wind and fire damage |                                                                                                                                          |



**Table S6.** Selection of newly available output variables and diagnostics of the JSBACH submodel.

| <i>JSBACH Process</i>                                     |                                                                                                                                                                                                      |
|-----------------------------------------------------------|------------------------------------------------------------------------------------------------------------------------------------------------------------------------------------------------------|
| Variable                                                  | Additional information                                                                                                                                                                               |
| <i>Hydrology</i>                                          |                                                                                                                                                                                                      |
| Fraction of organic material in soil layers               |                                                                                                                                                                                                      |
| Volume fraction of frozen water                           | Available for each soil layer.                                                                                                                                                                       |
| Wet (skin reservoir) fraction                             | Available for each soil layer and canopy level.                                                                                                                                                      |
| Water and ice content                                     | Available for each soil and snow layer and the total columns.                                                                                                                                        |
| Water content in root zone                                |                                                                                                                                                                                                      |
| Water stress factor of canopy                             |                                                                                                                                                                                                      |
| Depth of each soil layer that can be saturated with water |                                                                                                                                                                                                      |
| Rooted depth per soil layer (until rooting depth)         |                                                                                                                                                                                                      |
| Volumetric permanent wilting point                        |                                                                                                                                                                                                      |
| Evapotranspiration                                        | Available for land, water, ice, vegetation, soil, snow and skin reservoir.                                                                                                                           |
| Humidity at lowest atmospheric level                      |                                                                                                                                                                                                      |
| Surface drag coefficients                                 | Available for land, water and ice.                                                                                                                                                                   |
| <i>Carbon</i>                                             |                                                                                                                                                                                                      |
| Plant carbon pools                                        | Available for carbohydrate reserve (sugars, starches) that allows plants to survive. Additional for stems, thick roots and other (dead) structural matter and last for biomass harvested from crops. |
| Above ground and below ground litter carbon pools         | Available for green and woody litter, plus acid, water and ethanol soluble litter and non soluble litter.                                                                                            |
| Gross assimilation                                        | Available for each canopy layer and PFT.                                                                                                                                                             |
| Soil heterotrophic respiration                            | Available for each canopy layer and PFT.                                                                                                                                                             |
| Gross primary productivity                                | Available for each canopy layer and PFT.                                                                                                                                                             |
| Net primary productivity                                  | Available for each canopy layer and PFT.                                                                                                                                                             |
| <i>Phenology</i>                                          |                                                                                                                                                                                                      |
| Leaf area index (LAI)                                     | Available for each canopy layer and PFT.                                                                                                                                                             |
| <i>Fuel</i>                                               |                                                                                                                                                                                                      |
| Amount of fuel available for fire                         | Available for each PFT.                                                                                                                                                                              |
